# Supplementary material for: Carbon cycle and climate feedback under CO 2 and non-CO 2 overshoot pathways
Source: Copernicus journal article supplement (doi:10.5194/egusphere-2024-1553), 2024-06-05
Supplement: Supplementary file [file egusphere-2024-1553-AC1-supplement.pdf]

Our responses are in black, marked as **[Response]**, and the comments of the Reviewers are in purple, marked as **[Comment]**. In our responses, we mark the changes in the manuscript with shading and separate comments using “\*\*\*\*\*”.

## **Reviewer #1 (Remarks to the Author):**

The authors investigate carbon cycle feedbacks under CO<sub>2</sub> and non-CO<sub>2</sub> GHG forcings. Since non-CO<sub>2</sub> GHG lead to warming only, the CO<sub>2</sub> concentration induced component of the carbon cycle feedbacks is missing for this forcing. This motivates the authors to investigate what has been termed “non-linearity of carbon cycle feedbacks” in previous studies, but with a focus on non-CO<sub>2</sub> forcings. The authors use an impressive set of idealized model experiments to separate the different feedback components. The manuscript is generally well written, well structured, and the methods are sound and well described, although some parts of the manuscript could be improved in clarity and I found some of the results difficult to understand (see my comments below). There are only very few studies dealing with the interactions of non-CO<sub>2</sub> GHG forcing and the carbon cycle, even though non-CO<sub>2</sub> GHG reduction will be an important climate mitigation measure in pathways that limit global warming to below 2 degrees. Although the main results do not seem to be very surprising, I believe this study is a valuable contribution to this field and I would recommend publication in Earth System Dynamics after my comments listed below have been addressed.

We thank Dr. Schwinger for taking the time to read the manuscript and provide detailed and insightful comments and suggestions that helped to improve the manuscript.

\*\*\*\*\*

## **General comments**

### **[Comment 1]**

The topic of this study is complicated and not easy to grasp for a reader without specific knowledge of the carbon-cycle feedback literature. I would therefore encourage the authors to critically review their introduction and provide more explanation of the basic concepts and how they are related to the main topic of the study, the differences between CO<sub>2</sub> and non-CO<sub>2</sub> GHG forcings. More specifically, I think a link between the non-linearity of carbon cycle feedbacks and the feedbacks due to non-CO<sub>2</sub> GHG needs to be made, given that this topic is discussed quite extensively later in the manuscript. It would be a good idea to add a paragraph to the introduction that deals with the fact (and the causes for) that

temperature mediated feedbacks can be different under rising or constant CO<sub>2</sub>, and that this is the main difference between CO<sub>2</sub> and non-CO<sub>2</sub> GHG mediated feedbacks. Here it would be also pertinent to cite the two (to my knowledge) studies that have investigated the topic of non-linearity previously (Zickfeld et al. 2011 and Schwinger et al. 2014, both studies did not deal with non-CO<sub>2</sub> forcings). Also, in the Methods and Table 1, there are some sources of confusion, which should be addressed (see my specific comments below).

**On a related note, why do the authors not go a step further and introduce a new symbol for the cross term?** A clear definition of the “non-linear” or “cross-term” has been hampered by the fact that in the first studies using the beta/gamma framework (Friedlingstein et al. 2003, 2006), gamma was defined by [CO<sub>2</sub>]-[CO<sub>2</sub>bgc]. For this reason, also later studies that actually had a [CO<sub>2</sub>rad] simulation available continued using the term gamma for both climate carbon feedbacks [CO<sub>2</sub>rad] and [CO<sub>2</sub>]-[CO<sub>2</sub>bgc], as the authors mention themselves. This study might be a good opportunity to clean up with this “notational mess”?

#### **[Response]**

We are grateful for this comment and for the insight around the “notational mess”. As suggested, in Introduction we added a paragraph that introduces the nonlinearity concept with the citations on the suggested studies.

The weakening of land and ocean carbon sinks due to non-CO<sub>2</sub> GHGs underscores the importance of understanding the differences in carbon cycle feedbacks between CO<sub>2</sub> and non-CO<sub>2</sub> GHGs. Only the changes in CO<sub>2</sub> concentrations are associated with the carbon-concentration ( $\beta$ ) feedback, that is the response of the land and ocean carbon uptake to the changes in CO<sub>2</sub> concentration, mainly via the stimulation of photosynthesis through CO<sub>2</sub> fertilisation effect over land and the solubility pump over the ocean. The changes in both CO<sub>2</sub> and non-CO<sub>2</sub> concentrations are associated with the carbon-climate feedback ( $\gamma$ ), that is the response of the land and ocean carbon uptake to climate change, mainly via the increased plant and soil respiration over land and reduction of the CO<sub>2</sub> solubility in the ocean with warming (Arora et al., 2013; Schwinger et al., 2014; Zickfeld et al., 2011). Under changing CO<sub>2</sub> concentrations, land and ocean carbon storages are simultaneously exposed to the carbon-concentration and carbon-climate feedbacks. However, the interaction between these feedbacks can introduce a non-linearity in the system, whereby the combined effect is not simply the sum of individual feedbacks. Thus, temperature-mediated feedback can differ under changing versus constant CO<sub>2</sub> levels, an important distinction when comparing CO<sub>2</sub> and non-CO<sub>2</sub> GHG feedback mechanisms. Here, it is also important to acknowledge that other factors, such as time lags and potential irreversibilities in the climate system, may also

contribute to these differences (Boucher et al., 2012; Chimuka et al., 2023; Schwinger et al., 2014).

Previous studies investigated the nonlinearity in the carbon cycle feedback and revealed that the nonlinearity, or the cross term, may be comparable in size with  $\gamma$  (Schwinger et al., 2014; Zickfeld et al., 2011). They attributed the nonlinearity to the different responses of the land biosphere to the temperature changes, depending on the presence or absence of the CO<sub>2</sub> fertilisation effect, as well as the weakening of ocean circulation and mixing between water masses of different temperatures. However, these studies did not consider non-CO<sub>2</sub> GHGs.

We also fixed the mix-up in Table 1.

Following the Reviewer's suggestion, we introduced a symbol  $\chi$  for the cross-term. We modified the Methods section to clarify the reasoning behind the need for the new symbol.

Zickfeld et al. (2011) and Schwinger et al. (2014) demonstrated that Eq. (4) includes the residual term  $\varepsilon$ , which can be derived from the difference between [CO<sub>2</sub>] – [CO<sub>2</sub>bgc] and [CO<sub>2</sub>rad] - [piControl], using Eq. (5):

$$\varepsilon = \Delta U_{COU} - \Delta U_{BGC} - \Delta U_{RAD}. \quad (5)$$

These studies revealed that the residual 'nonlinearity' term depends on both CO<sub>2</sub> concentration and climate change, and it can be of the same order of magnitude as the  $\gamma$  term. Here, we propose attributing the residual nonlinearity to a cross term, associated with the nonlinearity feedback  $\chi$ . Although many recent studies continued to attribute  $\chi$  to the  $\gamma$  feedback—partly due to the absence of the [CO<sub>2</sub>rad] experiment in some experimental designs, and also because this approach has been widely established in earlier research (Friedlingstein et al., 2003, 2006)—we show that these metrics become less well-defined when examining the effects of both CO<sub>2</sub> and non-CO<sub>2</sub> GHGs on the carbon cycle.

\*\*\*\*\*

## [Comment 2]

In the section on the physical climate (section 3.1), the strongest warming is found in [CO<sub>2</sub>rad], but it is not explained why. [CO<sub>2</sub>rad] is warmer, particularly in the Arctic, than both [CO<sub>2</sub>] and [nonCO<sub>2</sub>], if I am not mistaken. Results show no very strong CO<sub>2</sub> physiological warming in [CO<sub>2</sub>bgc], but nevertheless the CO<sub>2</sub> physiological warming is used to explain the differences in simulations several times (e.g. lines 221-222), and it remains completely unclear to me why then [CO<sub>2</sub>rad] is the warmest simulation? **In previous studies, the strongest CO<sub>2</sub> physiological warming was found in the Arctic region for CMIP5 ESMs (Park et al. 2020),**

with significant regional SAT contributions. This study, which includes the predecessor ESM IPSL-CM5A-LR, could be mentioned in the context of the CO<sub>2</sub> physiological warming. In the present study, the authors find the CO<sub>2</sub> induced total warming smaller than the radiative warming alone in high latitudes (line 224, Fig. S5e), which is opposite from the results of the Park et al. study. This needs at least to be mentioned and if possible some explanation should be provided (the authors mention differences in snow albedo as an explanation, but this is rather a consequence than a cause of the different surface temperatures?).

**[Response]**

Indeed, we completely missed this point in the original manuscript. In the revised version, we added discussion on the larger warming in the [CO<sub>2</sub>rad] compared to the [CO<sub>2</sub>] experiment. We added some discussion, including a comparison with the findings of Park et al. (2020). We also revised Fig. S3 to include the [CO<sub>2</sub>rad] - [CO<sub>2</sub>] combination.

We tested several potential mechanisms that could lead to a larger warming in [CO<sub>2</sub>rad] compared to the [CO<sub>2</sub>] experiment. Particularly, Park et al. (2020) describe two contrasting effects of CO<sub>2</sub> fertilisation: (1) CO<sub>2</sub> leads to reduction in the stomatal conductance, which in its turn decreases evaporative cooling, and (2) CO<sub>2</sub> leads to higher leaf area index, which (i) increases evaporative cooling and (ii) decreases albedo, which also leads to warming. We cannot approve either of these mechanisms because land evaporation is slightly higher in the [CO<sub>2</sub>rad] experiment (Fig S5).

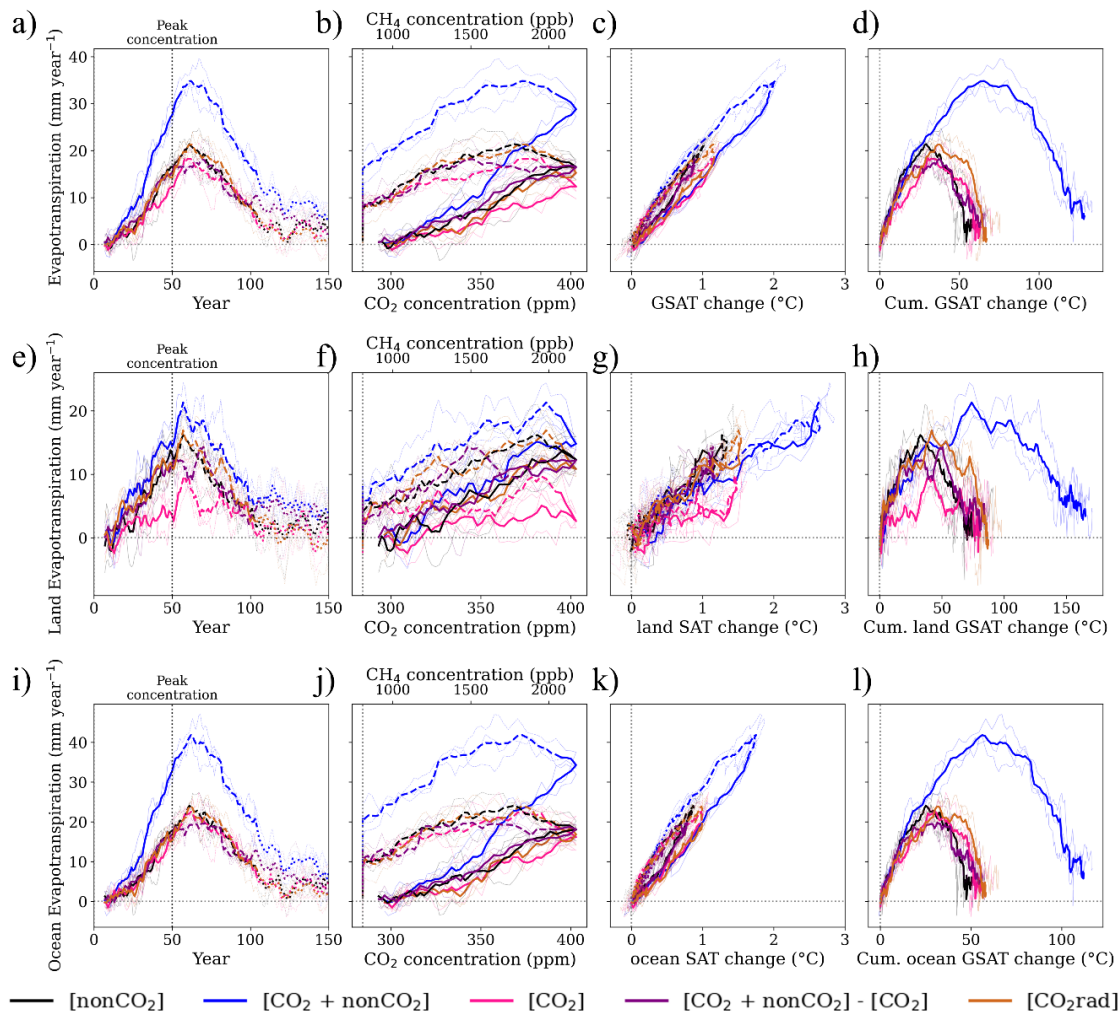

**Figure S5. (a–d) Global, (e–h) land and (i–l) ocean annually-averaged changes in evapotranspiration ( $\text{mm year}^{-1}$ ) as a function of (a, e, i) time (year), (b, f, j)  $\text{CO}_2$  concentration (ppm) /  $\text{CH}_4$  concentration (ppb, only for [non $\text{CO}_2$ ]), (c, g, k) GSAT ( $^{\circ}\text{C}$ ) and (d, h, l) cumulative GSAT ( $^{\circ}\text{C}$ ).**

The behaviour of the IPSL-CM6A-LR model remains the same in other similar experiments. Comparison of CMIP6 1pct $\text{CO}_2$  (fully-coupled experiment with 1%  $\text{CO}_2$  increase per year) and 1pct $\text{CO}_2$ -rad (same but radiatively-coupled) shows that, in agreement with our results, the fully coupled experiment produces a slightly higher surface air temperature increase, especially in the northern high latitudes, at moderate  $\text{CO}_2$  levels (Figure R1). Similar behaviour can be seen in the GFDL-ESM4 simulations but is absent in the NorESM2-LM. As noted by the Reviewer, the ensemble size in our study is small and the effects of the model's internal variability should be considerable.

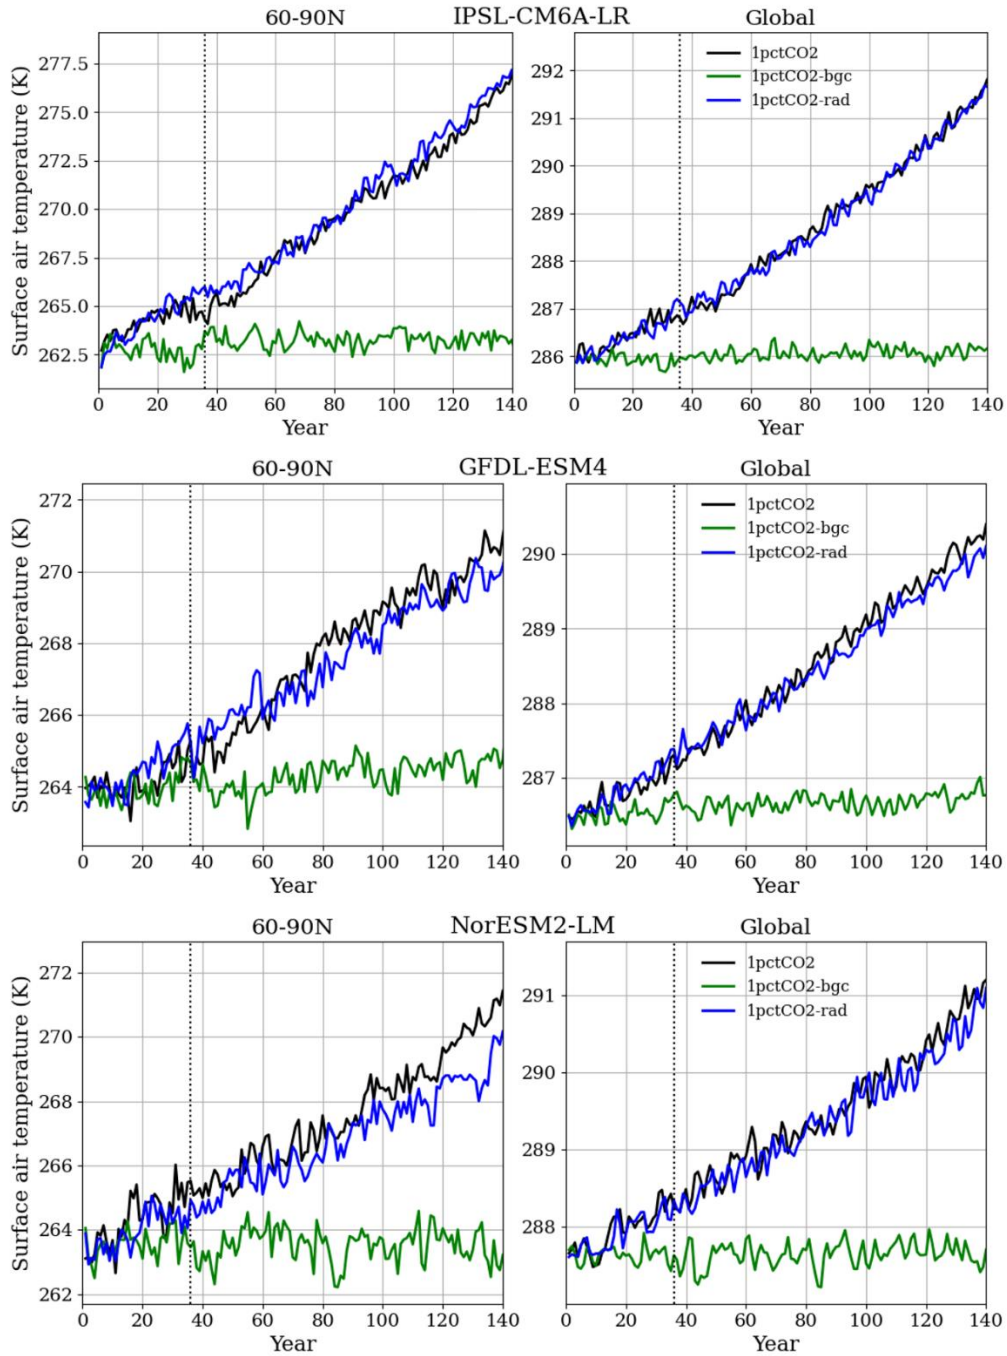

**Figure R1. Time series of (left) northern high-latitude (>60° N) and (right) global surface air temperature increase (K) in the radiatively-, biogeochemically- and fully-coupled 1pctCO<sub>2</sub> experiments by selected CMIP6 ESMs. The vertical dotted line indicates year, when the experiment's CO<sub>2</sub> concentration is nearly equal to the maximum CO<sub>2</sub> concentration (403 ppm) of this study.**

We have added the following discussion of the differences between our results and those of Park et al. (2020).



The combined effects of CO<sub>2</sub> physiological and radiative forcing do not lead to more warming, as the radiative forcing alone ([CO<sub>2</sub>rad] experiment) leads to a slightly higher global temperature increase compared to the coupled [CO<sub>2</sub>] experiment (Fig. 2a, b). This temperature difference is particularly evident in the Arctic region (Fig. S3a). Our findings differ from those of a CMIP5 intercomparison study, which reported that CO<sub>2</sub> physiological warming amplifies the Arctic warming (Park et al., 2020). The study showed that the CO<sub>2</sub> physiological effect contributes to high-latitude warming by reducing evaporative cooling due to stomatal closure under elevated CO<sub>2</sub> levels. In contrast, we observe higher evapotranspiration in the [CO<sub>2</sub>rad] compared to the [CO<sub>2</sub>] experiment (Fig. S5), which is probably a consequence of the lower warming in the [CO<sub>2</sub>] experiment. In our study, the greater warming in the [CO<sub>2</sub>rad] experiment may be driven by increased surface albedo, especially over the Arctic Ocean (Fig. S3b). While the underlying causes remain unclear, this pattern appears consistent in other experiments conducted with IPSL-CM6A-LR under moderate CO<sub>2</sub> levels (not shown). Because the ensemble size in our study is limited and the effects of the model's internal variability should be considerable, future research should validate the robustness of our findings with larger ensemble simulations.

\*\*\*\*\*

### [Comment 3]

Table 1 is somewhat confusing. Column 4 refers only to beta and gamma such that both experiments [CO<sub>2</sub>rad] and [CO<sub>2</sub>]-[CO<sub>2</sub>bgc] appear to be the same (they include the carbon cycle feedback “CO<sub>2</sub> gamma”), but it is not mentioned that the cross-term is present in [CO<sub>2</sub>]-[CO<sub>2</sub>bgc]. The same is true for [nonCO<sub>2</sub>] and [CO<sub>2</sub>bgc+nonCO<sub>2</sub>]-[CO<sub>2</sub>bgc]. Also, in the 5<sup>th</sup> column the only term listed for [CO<sub>2</sub>]-[CO<sub>2</sub>bgc] is the cross term, while the actual gamma-term is missing. Again, the same is true for [CO<sub>2</sub>bgc+nonCO<sub>2</sub>]-[CO<sub>2</sub>bgc]. In the footnotes, the terms  $\Delta U_{\gamma, \text{CO}_2 \text{ physiological}}$  and  $\Delta U_{\beta\gamma, \text{CO}_2 \text{ physiological}}$  are not defined anywhere. I would suggest to just say that the warming from the physiological CO<sub>2</sub> forcing is assumed to be negligible.

### [Response]

Columns 4 (“Included carbon cycle feedback”) and 5 (“Included carbon cycle terms from Eq.2”) in the original manuscript included such information, and apparently column 4

178 adds more confusion than clarity to the description of the experimental design. Thus, in the  
179 revised manuscript we delete it.

180 As the Reviewer pointed out, the terms in column 5 had errors on the included terms,  
181 which is now corrected. We also remove the original explanation on the  $\Delta U_{\gamma, CO_2 \text{physiological}}$  and  
182  $\Delta U_{\beta\gamma, CO_2 \text{physiological}}$  terms and added the following instead:

183 \*according to equations by Etminan et al. (2016), warming from the physiological  $CO_2$   
184 forcing is assumed to be negligible.  
185

186 \*\*\*\*\*

#### 187 [Comment 4]

188 In the abstract (line 21-22), even if Arora et al 2020 and Schwinger et al. 2014, did not  
189 use the term “cross-term” but “non-linearity”, the results are consistent with these studies. So  
190 I would suggest adding “consistent with previous studies that considered  $CO_2$  forcing only”.

#### 191 [Response]

192 We agree with the suggestion and revised the abstract accordingly.

193 We introduce a framework, consistent with previous studies that focused exclusively  
194 on  $CO_2$  forcing, to separate the carbon-climate feedback into the temperature and cross terms.  
195 Our findings reveal that these feedback terms are comparable in magnitude for the global  
196 ocean. This underscores the importance of considering both terms in carbon cycle feedback  
197 framework and climate change mitigation strategies.

198

199 \*\*\*\*\*

#### 200 Specific comments

#### 201 [Comment 1]

202 Equation 2: It might be pertinent to cite Schwinger et al. 2014 here, who used the  
203 Taylor expansion to define “nonlinearity” of carbon cycle feedbacks. Please double check the  
204 factor 1/2 in the cross-term (also in Equation 5), which is wrong I believe (only the quadratic  
205 terms have the factor of 1/2).

#### 206 [Response]

207 As suggested, we added the citation, changing text to:



208 Following Schwinger et al. (2014) the formulation can be expanded to a Taylor series...

209 Besides we agree that the factor of 1/2 is wrong here, removed.

210 \*\*\*\*\*

211 **[Comment 2]**

212 Equations 3-4: Why are the quadratic terms included here? They cannot be quantified,  
213 so they belong to the residual term in the context of this study.

214 **[Response]**

215 We respectfully disagree, because via our analysis, we conclude that second-order  
216 terms (quadratic terms) cannot be neglected. We think it is necessary to show them  
217 consistently with the quadratic term that is needed to define the cross term ( $\Delta U_{\chi}$ ), as shown  
218 below.

219 
$$\Delta U_{\beta} = \frac{\partial U}{\partial C_{CO_2}} \Delta C_{CO_2} + \frac{1}{2} \frac{\partial^2 U}{\partial C_{CO_2}^2} (\Delta C_{CO_2})^2 + Res., \quad (7)$$

220 
$$\Delta U_{\gamma} = \frac{\partial U}{\partial T} \Delta T + \frac{1}{2} \frac{\partial^2 U}{\partial T^2} \Delta T^2 + Res., \quad (8)$$

221 
$$\Delta U_{\chi} = \frac{\partial^2 U}{\partial C_{CO_2} \partial T} \Delta T \Delta C_{CO_2} + Res.. \quad (9)$$

222

223 \*\*\*\*\*

224 **[Comment 3]**

225 Line 19-20: Please double check the sentence: Shouldn't this be the other way around  
226 – “Non-CO2 forcing primarily affects temperature driven feedbacks...” or did I misunderstand  
227 something here?

228 **[Response]**

229 This indeed should be the other way around, now corrected.

230 CO<sub>2</sub> forcing affects both carbon-climate and carbon-concentration feedbacks, whereas non-  
231 CO<sub>2</sub> gases influence only the carbon-climate feedback.

232 \*\*\*\*\*

233 **[Comment 4]**

234 Line 22: It is a bit unclear what “both components” refers to. Also, non-CO2 forcing are  
235 usually considered in Earth system modelling, e.g., in SSP scenarios. Please reword this  
236 sentence to make the main conclusion of this paper clearer.

237 **[Response]**

238 We changed the wording to “feedback terms” to be consistent with the previous  
239 sentence. We further reworded the last sentence of the abstract by rewording “considered in  
240 Earth system modelling” to “considered in carbon cycle feedback framework”. Now it reads as  
241 follows:

242 Our findings reveal that these feedback terms are comparable in magnitude for the  
243 global ocean. This underscores the importance of considering both terms in carbon cycle  
244 feedback framework and climate change mitigation strategies.

245

246

247 \*\*\*\*\*

248 **[Comment 5]**

249 Line 75-81: “like many contemporary models” could be made more specific by saying  
250 “like all other ESMs participating in CMIP6” or similar. Generally, I think this paragraph is not  
251 necessary here. These are idealized concentration-driven experiments, so why discuss the  
252 lack of CH<sub>4</sub> and N<sub>2</sub>O emission-driven capability in the Introduction? Particularly, since a  
253 section on “limitations” exists at the end of the manuscript. I would suggest deleting this  
254 paragraph and move parts of the text to Section 4.

255 **[Response]**

256 We followed the Reviewer’s suggestion by deleting this paragraph and moving part of  
257 it to the section on study limitations as follows:

258 However for this study, the use of the model is justified because current changes in  
259 CH<sub>4</sub> and N<sub>2</sub>O concentrations are primarily driven by anthropogenic sources, suggesting that  
260 the absence of interactive modules of natural sink/source processes does not significantly  
261 affect the representation of natural variability trends for the CH<sub>4</sub> and N<sub>2</sub>O concentration  
262 (Nakazawa, 2020; Palazzo Corner et al., 2023; Zhu et al., 2013).

263

264 \*\*\*\*\*

265 **[Comment 6]**

266 Line 210-214: Although the physiological warming might be “significant” it is still quite  
267 small. Also, I would suggest being more careful here (and elsewhere in the manuscript), since  
268 the ensemble size is small and decadal scale variability can still be present in the ensemble

mean. For example, the “significant CO<sub>2</sub> physiological warming” in [CO<sub>2</sub>bgc] over “the high latitudes of land and ocean during stabilization period” could very well be an effect of AMOC, which happens to be significantly stronger over much of the stabilization period of [CO<sub>2</sub>bgc] compared to [piControl] in two of three ensemble members (Fig. S1a).

**[Response]**

We agree and, thus, changed the paragraph to include a more careful statement.

The CO<sub>2</sub> physiological warming that can be quantified by comparing [CO<sub>2</sub>bgc] with [piControl] is small (green line in Fig. 2). Spatially, some differences are ubiquitous over land, e.g., CO<sub>2</sub> physiological warming persists over Eurasia during the ramp-up period, and over the high latitudes of both land and ocean during the stabilisation period (Fig. S3a). A larger ensemble size of model simulations would be required to investigate these differences more thoroughly. In our following analysis on carbon cycle feedbacks, we assume the CO<sub>2</sub> physiological warming to be negligible.

\*\*\*\*\*

**[Comment 7]**

Line 219: “... the higher sensitivity to non-CO<sub>2</sub> forcing compared to CO<sub>2</sub> forcing”. This should be the other way round (SAT is higher under CO<sub>2</sub> forcing)?

**[Response]**

Indeed, this should be the other way round, corrected.

\*\*\*\*\*

**[Comment 8]**

Line 220-221: “The combined effect of CO<sub>2</sub> physiological and radiative forcing leads to more warming in the coupled [CO<sub>2</sub>] experiment compared to both the [CO<sub>2</sub>rad] experiment.” I guess the “both” should be deleted? Also, I cannot see this in Fig 2a, here [CO<sub>2</sub>rad] shows a stronger warming than [CO<sub>2</sub>]. This is consistent with the figures in the supplementary, which also show that [CO<sub>2</sub>rad] seems to be warmer than both [CO<sub>2</sub>] and [nonCO<sub>2</sub>], particularly in the high latitudes (Fig S3a). What is the reason for this? Also, as mentioned above, this is different from the CMIP5 study of Park et al. 2020.

**[Response]**

We deleted the unnecessary “both” term. We agree with the comment and revised the paragraph, as described in our response to General comment 2.

\*\*\*\*\*

#### [Comment 9]

Line 223-224: “...the CO<sub>2</sub>-induced total surface warming is larger than CO<sub>2</sub>-induced radiative warming almost everywhere, except for the high northern latitudes over the land and ocean (Fig. S3).” I can’t see this from Fig S3, because [CO<sub>2</sub>]-[CO<sub>2</sub>rad] is not shown there. Again, the most striking difference is that [CO<sub>2</sub>rad] is warmer than [nonCO<sub>2</sub>], particularly in high latitudes (and by comparison with the next column also warmer than [CO<sub>2</sub>] in the high latitudes. What is the reason for this difference?

#### [Response]

We added the [CO<sub>2</sub>]-[CO<sub>2</sub>rad] experiment to Fig. S3 in the revised manuscript version. We also revised the discussion, as described in our response to General comment 2.

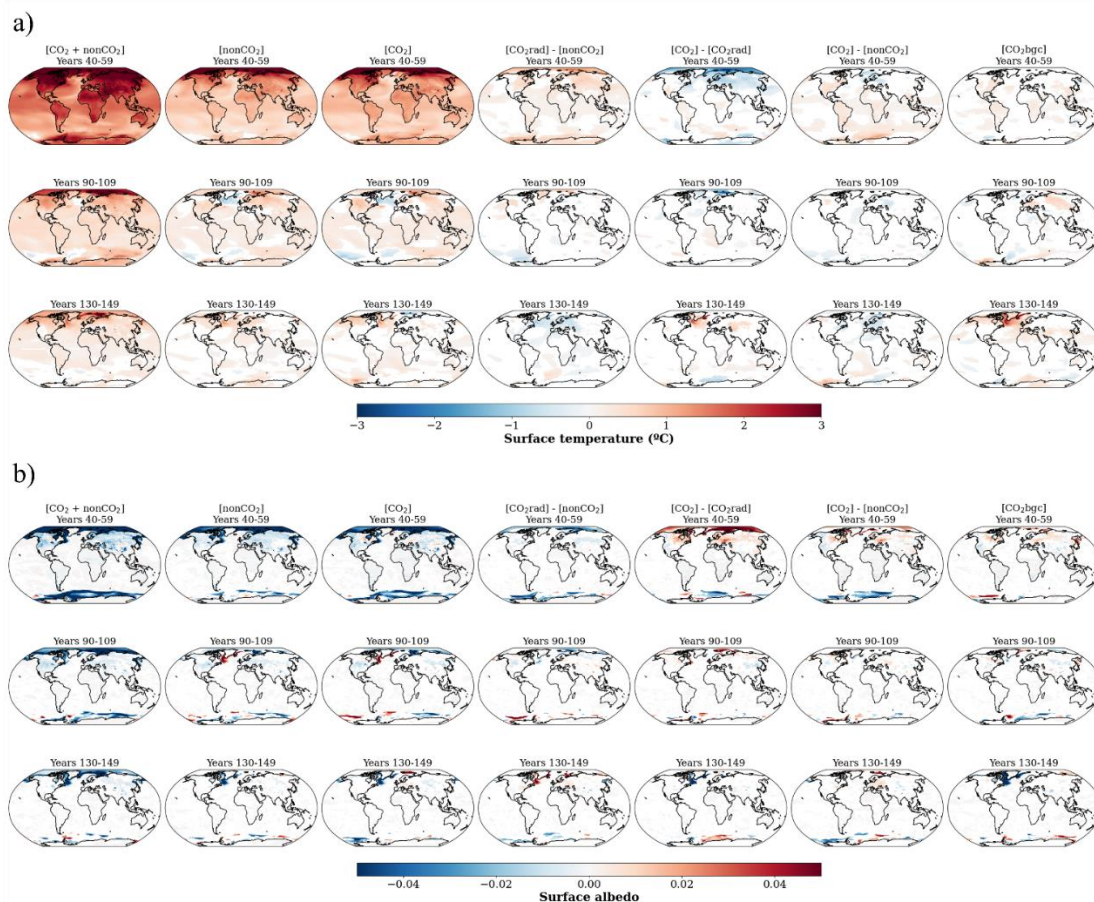

**Figure S3. Spatial variation of three-member-ensemble mean changes in (a) surface temperature (°C) and (b) surface albedo averaged over 20 years at the end of (first rows)**

ramp-up, (middle rows) ramp-down, and (bottom rows) stabilisation phases relative to piControl under selected scenarios. We draw only grids significantly different from piControl ( $p < 0.1$  based on t test, N=60) and between [CO<sub>2</sub>], [CO<sub>2</sub>rad] and [nonCO<sub>2</sub>] experiments using three ensemble members ( $p < 0.1$  based on t test, N=60).

\*\*\*\*\*

#### [Comment 10]

Line 238-243: This paragraph is very confusing. It seems to repeat things that have been explained in the Methods section, but in a way that I doubt is helpful for the reader. I would suggest either rewording and expanding this paragraph or deleting it. Again, the terms  $\Delta U_{\gamma, \text{CO}_2 \text{physiological}}$  and  $\Delta U_{\beta \gamma, \text{CO}_2 \text{physiological}}$  have never been defined in the manuscript.

#### [Response]

We now deleted the paragraph, as in section 3.1 we state that we assume CO<sub>2</sub> physiological warming to be negligible.

\*\*\*\*\*

#### [Comment 11]

Table 2: While CO<sub>2</sub> (and non-CO<sub>2</sub> GHG) concentrations are all the same in the different concentration driven experiments, this is not the case for the temperature increase. For example, SAT is 10-15% lower for [nonCO<sub>2</sub>] compared to [CO<sub>2</sub>] and [CO<sub>2</sub>rad] (estimated from Fig.2). Therefore, I am wondering if it would not make more sense to give values for gammas in this table? I would expect  $\Delta U_{\gamma, \text{nonCO}_2}$  be somewhat lower than  $\Delta U_{\gamma, \text{CO}_2 \text{rad}}$  just because of the lower temperature increase, while it is actually gamma which makes the most useful comparison between the simulations. More importantly, how are the cross-term carbon uptakes (first line in the lower part of the table) calculated? Shouldn't this be the difference between the second and fourth line of the upper part of the table? I cannot see this is the case.

#### [Response]

We chose to report values of cumulative fluxes rather than those of the feedback parameter because we wanted to show the changes for ramp-up, ramp-down and stabilisation periods. Estimation of the feedback parameter values for the end of the ramp-up period is possible and we included it in the newly added Table S1. We also added a column with experiment's peak temperatures (mean temperature at the end of ramp-up period) to Table 2.

However, due to the lagged responses of both temperature and carbon fluxes, estimation of feedback parameters for the ramp-down period is more challenging. Furthermore,

we would face numerical issues for calculating carbon cycle feedback parameters for stabilisation and total periods.

The newly added Table S1 (below) shows larger negative  $\gamma$  for land and smaller negative  $\gamma$  for ocean in the [CO<sub>2</sub>rad] compared to [nonCO<sub>2</sub>] experiment, but these differences are not statistically significant.

We confirmed some errors in the table for the means of the cross terms. We corrected them in the revised manuscript.

**Table 2. Cumulative CO<sub>2</sub> and climate change-driven changes in the land and ocean carbon fluxes (GtC), shown as three- member ensemble mean. The  $\pm$  indicates one standard deviation among the three members. Note that all experiments are analysed relative to their [piControl] counterparts.**

| Experiment                                 | Max. warming (K)* | Terms                                             | Years 1-50 (ramp-up) |           | Years 51-100 (ramp-down) |          | Years 101-150 (stabilisation) |          | Total    |          |
|--------------------------------------------|-------------------|---------------------------------------------------|----------------------|-----------|--------------------------|----------|-------------------------------|----------|----------|----------|
|                                            |                   |                                                   | Land                 | Ocean     | Land                     | Ocean    | Land                          | Ocean    | Land     | Ocean    |
| [CO <sub>2</sub> bgc]                      | 0.1±0.0           | $\Delta U_{\beta,CO_2}$                           | 179.3±2.2            | 103.8±0.7 | 16.3±6.0                 | 19.7±1.0 | 106.3±0.4                     | 32.1±0.8 | 59.4±1.8 | 53.4±0.9 |
| [CO <sub>2</sub> rad]                      | 1.1±0.1           | $\Delta U_{\gamma,CO_2}$                          | 18.6±2.4             | 2.4±0.2   | 4.5±5.7                  | 0.0±1.4  | 11.4±4.0                      | 0.3±1.9  | 2.2±2.0  | 2.1±0.6  |
| [nonCO <sub>2</sub> ]                      | 0.9±0.1           | $\Delta U_{\gamma,nonCO_2}$                       | 14.8±3.6             | 2.3±1.0   | 1.3±6.0                  | 0.5±1.3  | 10.2±2.4                      | 1.3±0.5  | 2.5±2.9  | 1.6±0.2  |
| [CO <sub>2</sub> ] - [CO <sub>2</sub> bgc] | 1.0±0.0           | $\Delta U_{\gamma,CO_2}$ + $\Delta U_{\chi,CO_2}$ | 14.7±1.0             | 4.5±0.2   | 3.8±3.0                  | 1.4±1.0  | 8.2±1.9                       | 0.6±0.5  | 3.8±3.1  | 5.5±1.4  |
|                                            |                   | $\Delta U_{\chi,CO_2}$                            | 3.9±2.1              | 2.2±0.4   | 0.7±7.3                  | 1.4±0.5  | 3.2±5.9                       | 0.2±2.3  | 1.6±5.0  | 3.4±2.0  |
|                                            |                   | $\Delta U_{\chi,nonCO_2}$                         | 3.5±1.5              | 1.6±1.0   | 2.8±7.9                  | 0.1±1.1  | 1.6±1.5                       | 1.0±1.3  | 2.0±4.0  | 2.5±1.0  |
|                                            |                   | $\Delta U_{\gamma,CO_2}$                          | 3.8±5.0              | 0.1±0.9   | 3.2±3.6                  | 0.5±0.9  | 1.2±2.6                       | 1.0±2.2  | 0.3±2.7  | 0.5±0.7  |
|                                            |                   | $\Delta U_{\chi,CO_2}$                            | 0.4±3.5              | 0.6±0.7   | 3.5±3.4                  | 1.6±1.0  | 1.6±7.4                       | 1.3±3.3  | 3.6±5.5  | 1.0±2.8  |

\* defined as the mean  $\Delta$ GSAT during years 41-60.

**Table S1. Changes in the carbon cycle feedback parameters for land and ocean at the end of the ramp-up period, shown as three- member ensemble mean. The  $\pm$  indicates one standard deviation among the three members. We use temperature of the fully coupled experiments to estimate  $\gamma$  and  $\chi$  feedbacks.**

| Experiment                                                               | Terms                                                     | Years 1-50 (ramp-up) |              |
|--------------------------------------------------------------------------|-----------------------------------------------------------|----------------------|--------------|
|                                                                          |                                                           | Land                 | Ocean        |
| [CO <sub>2</sub> bgc]                                                    | $\beta_{CO_2}$ (GtC ppm <sup>-1</sup> )                   | 1.51 ± 0.02          | 0.88 ± 0.01  |
| [CO <sub>2</sub> rad]                                                    | $\gamma_{CO_2}$ (GtC K <sup>-1</sup> )                    | -17.02 ± 1.44        | -2.17 ± 0.14 |
| [nonCO <sub>2</sub> ]                                                    | $\gamma_{nonCO_2}$ (GtC K <sup>-1</sup> )                 | -16.74 ± 4.12        | -2.58 ± 1.19 |
| [CO <sub>2</sub> ] - [CO <sub>2</sub> bgc] - [CO <sub>2</sub> rad]       | $\chi_{CO_2}$ (GtC ppm <sup>-1</sup> K <sup>-1</sup> )    | 0.03 ± 0.02          | -0.02 ± 0.0  |
| [nonCO <sub>2</sub> bgc] - [CO <sub>2</sub> bgc] - [nonCO <sub>2</sub> ] | $\chi_{nonCO_2}$ (GtC ppm <sup>-1</sup> K <sup>-1</sup> ) | 0.03 ± 0.01          | -0.01 ± 0.01 |

\*\*\*\*\*



369 **[Comment 12]**

370 Line 282-284: As mentioned above, it is a choice to “attribute” the cross-term to the  
371 carbon-climate feedback, which makes sense in the context of previous studies. But I don’t  
372 see why this would be necessary, and I would encourage the authors to drop this attribution  
373 and just go ahead with beta, gamma, and the cross-term (as mentioned above, maybe  
374 introduce a new symbol for the cross term?).

375 **[Response]**

376 We thank the Reviewer for the encouragement. We have divided the original "Carbon-  
377 Climate Feedback" section by creating a new section titled "Nonlinearity in Carbon Cycle  
378 Feedback." Additionally, we introduce the symbol  $\chi$  to represent the cross term.

379  
380 \*\*\*\*\*

381 **[Comment 13]**

382 Line 304: “larger climate change driven carbon source” is not precise. It is rather a  
383 larger climate change driven reduction of the ocean sink. The ocean remains a sink throughout.  
384 Same comment applies for line 312.

385 **[Response]**

386 Revised accordingly.

387 Over ocean, the contribution from the  $\chi$  term leads to a greater reduction in the carbon  
388 sink driven by climate change (Fig. 3).

389 ..

390 Spatially, while the Southern Ocean remains the largest ocean carbon sink in all  
391 considered experiments involving atmospheric CO<sub>2</sub> changes, it, along with the Atlantic Ocean,  
392 undergoes the largest climate change-driven reduction in carbon sink (Fig. 4).

393  
394 \*\*\*\*\*

395 **[Comment 14]**

396 Line 324: Why would reducing non-CO<sub>2</sub> GHG only change  $\Delta U_V$ ? By changing  
397 temperature, the cross-term would be affected, too.

398 **[Response]**

399 Agreed, changed to “implies alteration of  $\Delta U_\gamma$  and  $\Delta U_\chi$  terms.”

400

401 \*\*\*\*\*

402 **[Comment 15]**

403 Line 369-370: Again, the highest GSAT is found in [CO2rad] which is inconsistent with  
404 this conclusion.

405 **[Response]**

406 We removed this sentence from the Conclusions in the revised manuscript.

407

408 **Technical comments**

409 **[Comment 1]**

410 Line 37: delete “over”

411 **[Response]**

412 Deleted

413 \*\*\*\*\*

414 **[Comment 2]**

415 Line 69: consider changing to “to clarify whether the climate responses to declining  
416 CO2 and non-CO2 GHGs differ globally and regionally.”

417 **[Response]**

418 Changed to the suggested formulation.

419 \*\*\*\*\*

420 **[Comment 3]**

421 Line 86: Place reference to Boucher et al. 2020 after the model name, not after CMIP.  
422 Replace CMIP by CMIP6

423 **[Response]**

424 Changed accordingly.

425 \*\*\*\*\*

426 **[Comment 4]**

427           Line 96: Confusing sentence, please consider rewording. Maybe "... between a model  
428 experiment with perturbed GHG concentration but fixed sea surface and ice temperatures and  
429 a control simulation with pre-industrial GHG concentrations." or similar.

430 **[Response]**

431           Changed to the suggested formulation.

432

433 \*\*\*\*\*

434 **[Comment 5]**

435           Line 108: "referred to" could be understood as if the effective concentrations are used  
436 in the text and figures. I would suggest rewording this sentence.

437 **[Response]**

438           We reworded the second half of the sentence, which now reads:

439   The effective concentrations of CH<sub>4</sub> and N<sub>2</sub>O are used as input to the radiative transfer scheme  
440 of the climate model throughout the rest of this study. In the text and figures, these are  
441 presented as the actual (equivalent) concentrations.

442 \*\*\*\*\*

443 **[Comment 6]**

444           Line 156: Delete "atmospheric CO<sub>2</sub> induced".

445 **[Response]**

446           Deleted.

447

448 \*\*\*\*\*

449 **[Comment 7]**

450           Line 199: thermostatic -> thermosteric

451 **[Response]**

452           Corrected.

453

454 \*\*\*\*\*

455 **[Comment 8]**

456 Line 201: Consider replacing “under considered timescale” by “within the time-horizon  
457 considered here” or similar.

458 **[Response]**

459 Changed as suggested.

460

461 \*\*\*\*\*

462 **[Comment 9]**

463 Line 250: “... which induces carbon sink...” -> “which represents the CO2 induced  
464 carbon sink...”

465 **[Response]**

466 Changed as suggested.

467

468 \*\*\*\*\*

469 **[Comment 10]**

470 Line 254: Complicated sentence. Why not say “Over the ocean beta is positive (carbon  
471 sink) in all regions ...”

472 **[Response]**

473 Changed, as suggested. The sentence now reads:

474 Over the ocean  $\beta$  is positive (carbon sink) in all regions during the ramp-up period (Fig.  
475 4).

476

477 \*\*\*\*\*

478 **[Comment 11]**

479 Line 278: What do you mean by “prolonged duration of beta”? Please clarify.

480 **[Response]**

481 Changed to “the extended period of large  $\beta$  influence”.

482

483 \*\*\*\*\*

484 **[Comment 12]**

485 Line 286: Please spell out what “equivalent” means (within one standard deviation?).

486 **[Response]**

487 Added (within one standard deviation uncertainty range)”.

488 \*\*\*\*\*

489 **[Comment 13]**

490 Line 287: Remove subscript betas before “in Table 2”.

491 **[Response]**

492 Corrected

493

494 \*\*\*\*\*

495 **[Comment 14]**

496 Line 295: the gamma -> gamma

497 **[Response]**

498 Corrected.

499 \*\*\*\*\*

## 500 **Reviewer references**

501 Park, SW., Kim, JS. & Kug, JS. The intensification of Arctic warming as a result of CO<sub>2</sub>  
502 physiological forcing. *Nat Commun* **11**, 2098 (2020). [https://doi.org/10.1038/s41467-020-](https://doi.org/10.1038/s41467-020-15924-3)  
503 [15924-3](https://doi.org/10.1038/s41467-020-15924-3)

504 Schwinger, J., and Coauthors, 2014: Nonlinearity of Ocean Carbon Cycle Feedbacks  
505 in CMIP5 Earth System Models. *J. Climate*, **27**, 3869–3888, [https://doi.org/10.1175/JCLI-D-](https://doi.org/10.1175/JCLI-D-13-00452.1)  
506 [13-00452.1](https://doi.org/10.1175/JCLI-D-13-00452.1).

507 Zickfeld, K., M. Eby, H. D. Matthews, A. Schmittner, and A. J. Weaver, 2011:  
508 Nonlinearity of Carbon Cycle Feedbacks. *J. Climate*, **24**, 4255–4275,  
509 <https://doi.org/10.1175/2011JCLI3898.1>.

## 510 References

- 511 Arora, V. K., Boer, G. J., Friedlingstein, P., Eby, M., Jones, C. D., Christian, J. R., Bonan, G.,  
512 Bopp, L., Brovkin, V., Cadule, P., Hajima, T., Ilyina, T., Lindsay, K., Tjiputra, J. F., and Wu, T.:  
513 Carbon–Concentration and Carbon–Climate Feedbacks in CMIP5 Earth System Models, *J.*  
514 *Climate*, 26, 5289–5314, <https://doi.org/10.1175/JCLI-D-12-00494.1>, 2013.
- 515 Boucher, O., Halloran, P. R., Burke, E. J., Doutriaux-Boucher, M., Jones, C. D., Lowe, J.,  
516 Ringer, M. A., Robertson, E., and Wu, P.: Reversibility in an Earth System model in response  
517 to CO<sub>2</sub> concentration changes, *Environ. Res. Lett.*, 7, 024013, [https://doi.org/10.1088/1748-  
518 \*9326/7/2/024013\*, 2012.](https://doi.org/10.1088/1748-9326/7/2/024013)
- 519 Chimuka, V. R., Nzotungicimpaye, C.-M., and Zickfeld, K.: Quantifying land carbon cycle  
520 feedbacks under negative CO<sub>2</sub> emissions, *Biogeosciences*, 20, 2283–2299,  
521 <https://doi.org/10.5194/bg-20-2283-2023>, 2023.
- 522 Etminan, M., Myhre, G., Highwood, E. J., and Shine, K. P.: Radiative forcing of carbon dioxide,  
523 methane, and nitrous oxide: A significant revision of the methane radiative forcing,  
524 *Geophysical Research Letters*, 43, 12,614–12,623, <https://doi.org/10.1002/2016GL071930>,  
525 2016.
- 526 Friedlingstein, P., Dufresne, J.-L., Cox, P. M., and Rayner, P.: How positive is the feedback  
527 between climate change and the carbon cycle?, *Tellus B: Chemical and Physical Meteorology*,  
528 <https://doi.org/10.3402/tellusb.v55i2.16765>, 2003.
- 529 Friedlingstein, P., Cox, P., Betts, R., Bopp, L., von Bloh, W., Brovkin, V., Cadule, P., Doney,  
530 S., Eby, M., Fung, I., Bala, G., John, J., Jones, C., Joos, F., Kato, T., Kawamiya, M., Knorr,  
531 W., Lindsay, K., Matthews, H. D., Raddatz, T., Rayner, P., Reick, C., Roeckner, E., Schnitzler,  
532 K.-G., Schnur, R., Strassmann, K., Weaver, A. J., Yoshikawa, C., and Zeng, N.: Climate–  
533 Carbon Cycle Feedback Analysis: Results from the C4MIP Model Intercomparison, *J. Climate*,  
534 19, 3337–3353, <https://doi.org/10.1175/JCLI3800.1>, 2006.
- 535 Nakazawa, T.: Current understanding of the global cycling of carbon dioxide, methane, and  
536 nitrous oxide, *Proceedings of the Japan Academy, Series B*, 96, 394–419,  
537 <https://doi.org/10.2183/pjab.96.030>, 2020.
- 538 Palazzo Corner, S., Siebert, M., Ceppi, P., Fox-Kemper, B., Frölicher, T. L., Gallego-Sala, A.,  
539 Haigh, J., Hegerl, G. C., Jones, C. D., Knutti, R., Koven, C. D., MacDougall, A. H.,  
540 Meinshausen, M., Nicholls, Z., Sallée, J. B., Sanderson, B. M., Séférian, R., Turetsky, M.,  
541 Williams, R. G., Zaehle, S., and Rogelj, J.: The Zero Emissions Commitment and climate  
542 stabilization, *Frontiers in Science*, 1, <https://doi.org/10.3389/fsci.2023.1170744>, 2023.
- 543 Park, S.-W., Kim, J.-S., and Kug, J.-S.: The intensification of Arctic warming as a result of CO<sub>2</sub>  
544 physiological forcing, *Nature Communications*, 11, 2098, [https://doi.org/10.1038/s41467-020-  
545 \*15924-3\*, 2020.](https://doi.org/10.1038/s41467-020-15924-3)
- 546 Piao, S., Wang, X., Park, T., Chen, C., Lian, X., He, Y., Bjerke, J. W., Chen, A., Ciais, P.,  
547 Tømmervik, H., Nemani, R. R., and Myneni, R. B.: Characteristics, drivers and feedbacks of  
548 global greening, *Nature Reviews Earth & Environment*, 1, 14–27,  
549 <https://doi.org/10.1038/s43017-019-0001-x>, 2020.
- 550 Schwinger, J., Tjiputra, J. F., Heinze, C., Bopp, L., Christian, J. R., Gehlen, M., Ilyina, T., Jones,  
551 C. D., Salas-Méla, D., Segschneider, J., Séférian, R., and Totterdell, I.: Nonlinearity of Ocean  
552 Carbon Cycle Feedbacks in CMIP5 Earth System Models, *Journal of Climate*, 27, 3869–3888,  
553 <https://doi.org/10.1175/JCLI-D-13-00452.1>, 2014.



554 Zhu, X., Zhuang, Q., Gao, X., Sokolov, A., and Schlosser, C. A.: Pan-Arctic land–atmospheric  
555 fluxes of methane and carbon dioxide in response to climate change over the 21st century,  
556 Environmental Research Letters, 8, 045003, <https://doi.org/10.1088/1748-9326/8/4/045003>,  
557 2013.

558 Zickfeld, K., Eby, M., Matthews, H. D., Schmittner, A., and Weaver, A. J.: Nonlinearity of  
559 Carbon Cycle Feedbacks, Journal of Climate, 24, 4255–4275,  
560 <https://doi.org/10.1175/2011JCLI3898.1>, 2011.

561
