# Supplementary material for: Carbon cycle and climate feedback under CO 2 and non-CO 2 overshoot pathways
Source: Copernicus journal article supplement (doi:10.5194/egusphere-2024-1553), 2024-06-05
Supplement: Supplementary file [file egusphere-2024-1553-AC2-supplement.pdf]

1 Our responses are in black, marked as **[Response]**, and the comments of the Reviewers are  
2 in purple, marked as **[Comment]**. In our responses, we mark the changes in the manuscript  
3 with shading and separate comments using “\*\*\*\*\*”.

#### 4 **Reviewer #2 (Remarks to the Author):**

5 This study compares the climate and carbon cycle response to equivalent CO<sub>2</sub> and  
6 non-CO<sub>2</sub> forcings using a set of idealized concentration-driven simulations. The authors find  
7 that the climate-carbon feedback is dominant under non-CO<sub>2</sub> forcing whereas both the  
8 carbon-concentration and climate-carbon feedbacks are important under the CO<sub>2</sub> forcing.  
9 Under both CO<sub>2</sub> and non-CO<sub>2</sub> forcings, the land and ocean carbon uptake due to both  
10 feedbacks is quantified along with a cross term i.e., a term that quantifies the response to  
11 climate change in the presence of CO<sub>2</sub> concentration.

12 The manuscript reads well – the introduction and methods are written clearly and are  
13 easy to follow. My main concern is that the paper does not provide enough background to help  
14 the reader understand the results, particularly with regards to the meaning and calculation of  
15 the cross term, which is discussed at length in the results section. I suggest an expansion of  
16 the introduction section to include: (1) more background on previous non-linearity studies (2)  
17 and studies that previously quantified the cross term (if any). Furthermore, an addition to the  
18 methods section of: (1) the carbon cycle feedback framework ( $\beta$ ,  $\gamma$ ) and (2) the meaning of  
19 the cross term and how it is calculated under CO<sub>2</sub> and non-CO<sub>2</sub> forcing.

#### 20 **[Response]**

21 We thank the Reviewer for taking the time to read the manuscript and provide detailed  
22 and insightful comments that helped to improve the manuscript.

23 In response to the concern of the Reviewer as to the lack of background of the study,  
24 we expanded the Introduction to have a paragraph on the feedback nonlinearity and existing  
25 studies that investigate and quantify nonlinearity.

26 The weakening of land and ocean carbon sinks due to non-CO<sub>2</sub> GHGs underscores  
27 the importance of understanding the differences in carbon cycle feedbacks between CO<sub>2</sub> and  
28 non-CO<sub>2</sub> GHGs. Only the changes in CO<sub>2</sub> concentrations are associated with the carbon-  
29 concentration ( $\beta$ ) feedback, that is the response of the land and ocean carbon uptake to the  
30 changes in CO<sub>2</sub> concentration, mainly via the stimulation of photosynthesis through CO<sub>2</sub>  
31 fertilisation effect over land and the solubility pump over the ocean. The changes in both CO<sub>2</sub>  
32 and non-CO<sub>2</sub> concentrations are associated with the carbon-climate feedback ( $\gamma$ ), that is the  
33 response of the land and ocean carbon uptake to climate change, mainly via the increased

34 plant and soil respiration over land and reduction of the CO<sub>2</sub> solubility in the ocean with  
 35 warming (Arora et al., 2013; Schwinger et al., 2014; Zickfeld et al., 2011). Under changing  
 36 CO<sub>2</sub> concentrations, land and ocean carbon storages are simultaneously exposed to the  
 37 carbon-concentration and carbon-climate feedbacks. However, the interaction between these  
 38 feedbacks can introduce a non-linearity in the system, whereby the combined effect is not  
 39 simply the sum of individual feedbacks. Thus, temperature-mediated feedback can differ  
 40 under changing versus constant CO<sub>2</sub> levels, an important distinction when comparing CO<sub>2</sub> and  
 41 non-CO<sub>2</sub> GHG feedback mechanisms. Here, it is also important to acknowledge that other  
 42 factors, such as time lags and potential irreversibilities in the climate system, may also  
 43 contribute to these differences (Boucher et al., 2012; Chimuka et al., 2023; Schwinger et al.,  
 44 2014).

45 Previous studies investigated the nonlinearity in the carbon cycle feedback and  
 46 revealed that the nonlinearity, or the cross term, may be comparable in size with  $\gamma$  (Schwinger  
 47 et al., 2014; Zickfeld et al., 2011). They attributed the nonlinearity to the different responses  
 48 of the land biosphere to the temperature changes, depending on the presence or absence of  
 49 the CO<sub>2</sub> fertilisation effect, as well as the weakening of ocean circulation and mixing between  
 50 water masses of different temperatures. However, these studies did not consider non-CO<sub>2</sub>  
 51 GHGs.

52  
 53 We also expanded the subsection “2.3 Carbon cycle feedback attribution” of the  
 54 Methods to have more detailed and clear information about the carbon cycle feedback  
 55 framework and the cross term.

56 Traditionally, carbon cycle feedback analysis relies on [CO<sub>2</sub>], [CO<sub>2</sub>bgc] and [CO<sub>2</sub>rad]  
 57 simulations (Arora et al., 2013, 2020; Friedlingstein et al., 2006; Gregory et al., 2009;  
 58 Schwinger et al., 2014; Schwinger and Tjiputra, 2018; Williams et al., 2019; Zickfeld et al.,  
 59 2011). The carbon uptake ( $\Delta U$ ) can then be estimated using the well-established carbon cycle  
 60 feedback framework as a sum of carbon-concentration  $\beta$  parameter (GtC ppm<sup>-1</sup>) multiplied by  
 61 the changes in the atmospheric CO<sub>2</sub> concentration  $\Delta C_{CO_2}$  (ppm) and carbon-climate  $\gamma$   
 62 feedback parameter (GtC K<sup>-1</sup>) multiplied by the changes in surface temperature  $\Delta T$  (K), using  
 63 Eq. (1):

$$64 \quad \Delta U = \beta \times \Delta C_{CO_2} + \gamma \times \Delta T + \varepsilon . \quad (1)$$

65 Here, term  $\varepsilon$  refers to a residual term.

66 The  $\beta$  parameter can be estimated from the [CO<sub>2</sub>bgc] - [piControl], using Eq. (2):

$$67 \quad \beta = \frac{\Delta U_{BGC}}{\Delta C_{CO_2}}, \quad (2)$$

68 where  $\Delta U_{BGC}$  is the carbon uptake in the biogeochemically-coupled experiment  
 69 [CO<sub>2</sub>bgc]. The  $\beta$  feedback is associated with strengthening of the land and ocean carbon sink

70 (positive to the land and ocean). Thus, it acts as negative climate feedback (decreasing CO<sub>2</sub>  
71 content and dampening climate change).

72 Existing studies derived the  $\gamma$  feedback from the [CO<sub>2</sub>rad] - [piControl] combination of  
73 experiments, using Eq. (3), as well as from the difference between the [CO<sub>2</sub>] and [CO<sub>2</sub>bgc]  
74 experiments, hereafter referred to as [CO<sub>2</sub>] – [CO<sub>2</sub>bgc], using Eq. (4) (Arora et al., 2013, 2020;  
75 Asaadi et al., 2024; Friedlingstein et al., 2003, 2006; Melnikova et al., 2021):

$$76 \quad \gamma = \frac{\Delta U_{RAD}}{\Delta T}, \quad (3)$$

$$77 \quad \gamma = \frac{\Delta U_{COU-BGC}}{\Delta T}, \quad (4)$$

78 where  $\Delta U_{RAD}$  and  $\Delta U_{COU-BGC}$  are the carbon uptake in the radiatively-coupled  
79 experiment [CO<sub>2</sub>rad] and the difference between the COU and BGC experiments [CO<sub>2</sub>] –  
80 [CO<sub>2</sub>bgc]. The  $\gamma$  feedback is associated with a weakening of the land and ocean carbon sinks  
81 globally, albeit with regional variability (negative to the land and ocean). Thus, it acts as  
82 positive climate feedback (increasing CO<sub>2</sub> content and accelerating climate change).  
83

84 \*\*\*\*\*

## 85 **Minor comments**

86 A few minor comments are included below:

### 87 **[Comment 1]**

88 L19: I suggest using the term ‘climate-carbon cycle feedback’ instead of temperature-  
89 driven feedback, since that is the terminology most used in the field.

### 90 **[Response]**

91 We agree and changed the term to “carbon-climate feedback” to be consistent with  
92 existing studies (e.g., Arora et al., 2013; Schwinger et al., 2014).

93

94 \*\*\*\*\*

### 95 **[Comment 2]**

96 L20: Is this sentence correct? From my understanding, the CO<sub>2</sub> forcing drives both  
97 carbon cycle feedbacks through changes in CO<sub>2</sub> concentration and temperature, whereas the  
98 non-CO<sub>2</sub> forcing drives the climate carbon cycle feedback only through changes in  
99 temperature. Please clarify.

### 100 **[Response]**

101 This indeed was erroneous (should be the other way round), now corrected.

102 CO<sub>2</sub> forcing affects both carbon-climate and carbon-concentration feedbacks, whereas  
103 non-CO<sub>2</sub> gases influence only the carbon-climate feedback.

104

105 \*\*\*\*\*

106 **[Comment 4]**

107 L38: Acronym 'GHG' not introduced - I suggest writing greenhouse gas in full here.

108 **[Response]**

109 Added.

110

111 \*\*\*\*\*

112 **[Comment 5]**

113 L50: Please specify which forcing components were included in the Richardson et al.  
114 (2019) study. If the study included the response to CO<sub>2</sub> and non-CO<sub>2</sub> forcing, I suggest briefly  
115 discussing the results from this study in your introduction section, and if possible, comparing  
116 these results to your results in your discussion section.

117 **[Response]**

118 We add clarification, now the text reads as follows.

119 Richardson et al. (2019) revealed spatial and temporal differences in the surface  
120 temperature response to different forcings, such as CO<sub>2</sub> and CH<sub>4</sub>, in part due to the  
121 physiological CO<sub>2</sub> warming over the densely vegetated regions that is absent under non-CO<sub>2</sub>  
122 forcing.

123 Our findings are consistent with Richardson et al. (2019), which we briefly  
124 acknowledge in the revised manuscript.

125 When comparing CO<sub>2</sub>- and non-CO<sub>2</sub>-induced forcing ([CO<sub>2</sub>] and [nonCO<sub>2</sub>]  
126 experiments) at a global scale, our results are consistent with Richardson et al. (2019) who  
127 show the higher surface temperature response of CO<sub>2</sub> when compared to CH<sub>4</sub>.

128 \*\*\*\*\*

129 **[Comment 6]**

130 L58: This may be a good point to link non-CO<sub>2</sub> forcing to the climate-carbon cycle  
131 feedback.

132 Non-CO<sub>2</sub> forcing induces warming => capacity of the land and ocean sinks reduces  
133 => atmospheric CO<sub>2</sub> concentration and temperature affected. It may also help to explain why  
134 the non-CO<sub>2</sub> concentration-carbon feedback is not relevant.

135 **[Response]**

136 We are grateful for this suggestion. Following the Reviewer's comment, we added a  
137 linkage of non-CO<sub>2</sub> forcing to the climate-carbon cycle feedback to the Introduction as  
138 described in our response to the main comment.

139 \*\*\*\*\*

140 **[Comment 7]**

141 L60: It may help readers to preface this paragraph with a brief description of how the  
142 two carbon cycle feedbacks work under increasing and decreasing CO<sub>2</sub> concentrations. This  
143 will make it easier to understand L62 where you state the results from your Melnikova et al.  
144 (2021) study.

145 **[Response]**

146 We agree and added a brief description as follows.

147 Previous studies have also examined the impact of declining atmospheric CO<sub>2</sub>  
148 concentrations on the climate and carbon cycle (Boucher et al., 2012; Chimuka et al., 2023;  
149 Jones et al., 2016; Koven et al., 2023; Melnikova et al., 2021; Schwinger and Tjiputra, 2018).  
150 During the period of decreasing atmospheric CO<sub>2</sub> concentrations and temperature (ramp-  
151 down), the  $\beta$  and  $\gamma$  feedbacks are influenced by both the reduction of CO<sub>2</sub> levels and  
152 temperature and the inertia of the carbon cycle—specifically, the altered land and ocean  
153 carbon pools resulting from prior increases in the CO<sub>2</sub> concentrations and temperature  
154 (Chimuka et al., 2023; Zickfeld et al., 2016).

155 \*\*\*\*\*

156 \*\*\*\*\*

157 **[Comment 8]**

158 L69-71: This sentence is too long. For clarity, please separate the two research  
159 questions using (1) and (2) or a semi-colon.

160 **[Response]**

161 We followed the Reviewer’s suggestion by moving “carbon cycle responses” to the first  
162 question and focusing on the nonlinearity feedback in the second research question.

163 The purpose of this study is twofold:

- 164 – to clarify whether the climate and carbon cycle responses to declining CO<sub>2</sub> and non-  
165 CO<sub>2</sub> GHGs differ globally and regionally
- 166 – to investigate the carbon cycle nonlinearity feedback under CO<sub>2</sub> and non-CO<sub>2</sub> GHG  
167 decrease, and the different implications for climate change mitigation.

168

169 \*\*\*\*\*

170 **[Comment 9]**

171 L81: Please clarify which climate factors you are referring to here.

172 **[Response]**

173 Following specific comment 5 of Reviewer #1, we removed this paragraph on the  
174 study’s approach limitations, just keeping part of it in the discussion section. Thus, this  
175 sentence has now been deleted. We keep justification of the use of IPSL-CM6A-LR with the  
176 following text.

177 However for this study, the use of the model is justified because current changes in  
178 CH<sub>4</sub> and N<sub>2</sub>O concentrations are primarily driven by anthropogenic sources, suggesting that  
179 the absence of interactive modules of natural sink/source processes does not significantly  
180 affect the representation of natural variability trends for the CH<sub>4</sub> and N<sub>2</sub>O concentration  
181 (Nakazawa, 2020; Palazzo Corner et al., 2023; Zhu et al., 2013).

182

183 \*\*\*\*\*

184 **[Comment 10]**

185 L120: From my understanding of the table format, experiments are above the  
186 horizontal line, while combinations of experiments are below the horizontal line. This is why I  
187 am surprised that the [CO2bgc+non-CO2] experiment is above the line. Is this an experiment  
188 or an addition of two separately run experiments? If it is indeed an experiment, then I assume  
189 you prescribed both CO2 forcing and non-CO2 forcings, then specified the piControl CO2  
190 concentration in the radiation code? If so, that would mean that the only warming seen in that  
191 experiment would be CO2 physiological warming, so how then can non-CO2  $\gamma$  be included in  
192 this experiment? Please clarify.

193 **[Response]**

194 This understanding is correct, this was indeed an experiment. We prescribed the  
195 piControl CO<sub>2</sub> concentration and varying non-CO<sub>2</sub> (CH<sub>4</sub> and N<sub>2</sub>O) concentrations in the  
196 radiation code. Thus, the non-CO<sub>2</sub> radiative and CO<sub>2</sub> physiological (negligible) forcings caused  
197 the warming. This is consistent with our original description in the table. We added a clarifying  
198 sentence to the section on Experiment design.

199 Additionally, an experiment that combines nonCO<sub>2</sub> radiative forcing with CO<sub>2</sub>  
200 physiological forcing [CO<sub>2</sub>bgc + nonCO<sub>2</sub>] allows for the comparison of nonlinearities arising  
201 from combined carbon-concentration feedback and CO<sub>2</sub>- and non-CO<sub>2</sub>-driven carbon-climate  
202 feedback ([CO<sub>2</sub>bgc + nonCO<sub>2</sub>]). It serves as the nonCO<sub>2</sub> counterpart of the [CO<sub>2</sub>] experiment.  
203

204  
205 \*\*\*\*\*

206 **[Comment 11]**

207 On the same note, is the additional combination [CO<sub>2</sub>bgc+non-CO<sub>2</sub>]-[CO<sub>2</sub>bgc]  
208 necessary? It looks like we could get at non-CO<sub>2</sub>  $\gamma$  by taking the difference between  
209 [CO<sub>2</sub>+non-CO<sub>2</sub>] and [CO<sub>2</sub>] and this would give the cross term as well. Is there a benefit to  
210 using [CO<sub>2</sub>bgc+non-CO<sub>2</sub>]-[CO<sub>2</sub>bgc] over [CO<sub>2</sub>+non-CO<sub>2</sub>]-[CO<sub>2</sub>]?  
211

211 **[Response]**

212 The Reviewer is correct that non-CO<sub>2</sub>  $\gamma$  may be derived either from [CO<sub>2</sub>bgc+non-  
213 CO<sub>2</sub>]-[CO<sub>2</sub>bgc] or from [CO<sub>2</sub>+non-CO<sub>2</sub>]-[CO<sub>2</sub>], with both combinations involving two  
214 experiments. However, there are at least two benefits of using [CO<sub>2</sub>bgc+non-CO<sub>2</sub>]-[CO<sub>2</sub>bgc].  
215 Firstly, it is consistent with deriving  $\gamma_{CO_2}$  and  $\chi_{CO_2}$  terms from [CO<sub>2</sub>]-[CO<sub>2</sub>bgc], because both  
216 combinations subtract the BGC component from an experiment that has  $\beta$ ,  $\gamma$  and  $\chi$ . Secondly,  
217 using [CO<sub>2</sub>+non-CO<sub>2</sub>]-[CO<sub>2</sub>] would lead to a using an experiment with nearly doubled  
218 warming level ([CO<sub>2</sub>+non-CO<sub>2</sub>]), that would affect the value of cross term  $\chi$  (probably by  
219 overestimating it).  
220

221 \*\*\*\*\*

222 **[Comment 12]**

223 In the 4th column, the first two combinations of experiments seem to be missing the  
224  $\Delta U!$  components.

225 **[Response]**

226 Thank you, this is now corrected.

227

228 \*\*\*\*\*

229 **[Comment 13]**

230 Figure 1: I would like to commend the authors on this figure – it complements the  
231 methods section very nicely.

232 **[Response]**

233 We sincerely thank the Reviewer.

234

235 \*\*\*\*\*

236 **[Comment 14]**

237 L146: Section 3.1 assumes that readers have a solid grasp of the carbon cycle  
238 feedback framework and the feedback parameters ( $\beta$ ,  $\gamma$ ) used, which may not be the case. I  
239 suggest prefacing this section with a brief description of carbon cycle feedback parameters  
240 (equations for quantification, units and sign convention) before introducing  $\Delta U$ .

241 **[Response]**

242 We added a paragraph with a brief explanation on the  $\beta$ ,  $\gamma$  quantification, units and  
243 sign convention, as suggested (although not before but after introducing  $\Delta U$ ), as described in  
244 our response to the Reviewer's main comment.

245

246 \*\*\*\*\*

247 **[Comment 15]**

248 L184: I suggest citing Zickfeld et al. (2011) here.

249 **[Response]**

250 Thank you for bringing up this study that we had missed. The refence has now be  
251 added together with some other relevant publications that we also missed in the original  
252 manuscript (Arora et al., 2013; Schwinger et al., 2014). We also added references to Zickfeld  
253 et al. (2011) in several other places in the revised manuscript (e.g., in the new paragraph in  
254 the Introduction about existing studies on nonlinearity of carbon cycle feedbacks).

255



256 \*\*\*\*\*

257 **[Comment 16]**

258 Figure 2: Is the last column of panels on Figure 2 necessary? I notice that these figures  
259 are hardly referenced.

260 **[Response]**

261 We agree and removed the last column of Figure 2.

262

263 \*\*\*\*\*

264 **[Comment 17]**

265 Also, I suggest using a different colour for either the CO<sub>2</sub> or CO<sub>2</sub>b<sub>gc</sub> lines? The two  
266 are compared several times in the text but the colours are difficult to distinguish on the figure  
267 panels.

268 **[Response]**

269 We changed the colour of [CO<sub>2</sub>] from orange to deep pink for a better distinction.

270

271 \*\*\*\*\*

272 **[Comment 18]**

273 L219: What is the reason for the higher sensitivity to non-CO<sub>2</sub> forcing than CO<sub>2</sub>  
274 forcing?

275 **[Response]**

276 We apologize for the confusion in text, as it should be opposite, i.e., higher sensitivity  
277 of CO<sub>2</sub> forcing compared to non-CO<sub>2</sub> forcing. We made the correction and added a clarification  
278 for the reason as follows.

279 Our results are consistent with Nordling et al. (2021) who show the higher effective  
280 temperature response for CO<sub>2</sub> forcing compared to non-CO<sub>2</sub> forcing, attributing it to the  
281 changes in clear-sky planetary emissivity.

282

283 \*\*\*\*\*

284 **[Comment 19]**

285 L262: It appears that the figure in the paper referenced – Chimuka et al. (2023) –  
286 shows little hysteresis in autotrophic respiration and GPP, and not in heterotrophic respiration  
287 as mentioned in the text.

288 **[Response]**

289 This is indeed true, we misread the paper. We now removed the sentence.

290

291 \*\*\*\*\*

292 **[Comment 20]**

293 L283-284: Are there merits to attributing the cross term to  $\gamma$  rather than keeping it as  
294 a separate term?

295 Keeping the legacy of previous studies is probably the biggest merit. However,  
296 considering the implications of the carbon cycle framework for nonCO<sub>2</sub> scenarios, it is more  
297 accurate to keep the cross-term as a separate feedback term. Following encouragement from  
298 Reviewer #1, we introduced the new symbol  $\chi$  for the cross-term and divided the original  
299 "Carbon-Climate Feedback" section into two parts, creating a new section titled "Nonlinearity  
300 in Carbon Cycle Feedback."  
301

302 **References**

- 303 Arora, V. K., Boer, G. J., Friedlingstein, P., Eby, M., Jones, C. D., Christian, J. R., Bonan, G.,  
304 Bopp, L., Brovkin, V., Cadule, P., Hajima, T., Ilyina, T., Lindsay, K., Tjiputra, J. F., and Wu, T.:  
305 Carbon–Concentration and Carbon–Climate Feedbacks in CMIP5 Earth System Models, *J.*  
306 *Climate*, 26, 5289–5314, <https://doi.org/10.1175/JCLI-D-12-00494.1>, 2013.
- 307 Arora, V. K., Katavouta, A., Williams, R. G., Jones, C. D., Brovkin, V., Friedlingstein, P.,  
308 Schwinger, J., Bopp, L., Boucher, O., Cadule, P., Chamberlain, M. A., Christian, J. R., Delire,  
309 C., Fisher, R. A., Hajima, T., Ilyina, T., Joetzjer, E., Kawamiya, M., Koven, C. D., Krasting, J.  
310 P., Law, R. M., Lawrence, D. M., Lenton, A., Lindsay, K., Pongratz, J., Raddatz, T., Séférian,  
311 R., Tachiiri, K., Tjiputra, J. F., Wiltshire, A., Wu, T., and Ziehn, T.: Carbon–concentration and  
312 carbon–climate feedbacks in CMIP6 models and their comparison to CMIP5 models,  
313 *Biogeosciences*, 17, 4173–4222, <https://doi.org/10.5194/bg-17-4173-2020>, 2020.
- 314 Asaadi, A., Schwinger, J., Lee, H., Tjiputra, J., Arora, V., Séférian, R., Liddicoat, S., Hajima,  
315 T., Santana-Falcón, Y., and Jones, C. D.: Carbon cycle feedbacks in an idealized simulation  
316 and a scenario simulation of negative emissions in CMIP6 Earth system models,  
317 *Biogeosciences*, 21, 411–435, <https://doi.org/10.5194/bg-21-411-2024>, 2024.
- 318 Boucher, O., Halloran, P. R., Burke, E. J., Doutriaux-Boucher, M., Jones, C. D., Lowe, J.,  
319 Ringer, M. A., Robertson, E., and Wu, P.: Reversibility in an Earth System model in response  
320 to CO<sub>2</sub> concentration changes, *Environ. Res. Lett.*, 7, 024013, [https://doi.org/10.1088/1748-](https://doi.org/10.1088/1748-9326/7/2/024013)  
321 [9326/7/2/024013](https://doi.org/10.1088/1748-9326/7/2/024013), 2012.
- 322 Chimuka, V. R., Nzotungicimpaye, C.-M., and Zickfeld, K.: Quantifying land carbon cycle  
323 feedbacks under negative CO<sub>2</sub> emissions, *Biogeosciences*, 20, 2283–2299,  
324 <https://doi.org/10.5194/bg-20-2283-2023>, 2023.
- 325 Friedlingstein, P., Dufresne, J.-L., Cox, P. M., and Rayner, P.: How positive is the feedback  
326 between climate change and the carbon cycle?, *Tellus B: Chemical and Physical Meteorology*,  
327 <https://doi.org/10.3402/tellusb.v55i2.16765>, 2003.
- 328 Friedlingstein, P., Cox, P., Betts, R., Bopp, L., von Bloh, W., Brovkin, V., Cadule, P., Doney,  
329 S., Eby, M., Fung, I., Bala, G., John, J., Jones, C., Joos, F., Kato, T., Kawamiya, M., Knorr,  
330 W., Lindsay, K., Matthews, H. D., Raddatz, T., Rayner, P., Reick, C., Roeckner, E., Schnitzler,  
331 K.-G., Schnur, R., Strassmann, K., Weaver, A. J., Yoshikawa, C., and Zeng, N.: Climate–  
332 Carbon Cycle Feedback Analysis: Results from the C4MIP Model Intercomparison, *J. Climate*,  
333 19, 3337–3353, <https://doi.org/10.1175/JCLI3800.1>, 2006.
- 334 Gregory, J. M., Jones, C. D., Cadule, P., and Friedlingstein, P.: Quantifying Carbon Cycle  
335 Feedbacks, *J. Climate*, 22, 5232–5250, <https://doi.org/10.1175/2009JCLI2949.1>, 2009.
- 336 Jones, C. D., Ciais, P., Davis, S. J., Friedlingstein, P., Gasser, T., Peters, G. P., Rogelj, J.,  
337 van Vuuren, D. P., Canadell, J. G., Cowie, A., Jackson, R. B., Jonas, M., Kriegler, E., Littleton,  
338 E., Lowe, J. A., Milne, J., Shrestha, G., Smith, P., Torvanger, A., and Wiltshire, A.: Simulating  
339 the Earth system response to negative emissions, *Environmental Research Letters*, 11,  
340 095012, <https://doi.org/10.1088/1748-9326/11/9/095012>, 2016.
- 341 Koven, C. D., Sanderson, B. M., and Swann, A. L. S.: Much of zero emissions commitment  
342 occurs before reaching net zero emissions, *Environmental Research Letters*, 18, 014017,  
343 <https://doi.org/10.1088/1748-9326/acab1a>, 2023.
- 344 Melnikova, I., Boucher, O., Cadule, P., Ciais, P., Gasser, T., Quilcaille, Y., Shiogama, H.,  
345 Tachiiri, K., Yokohata, T., and Tanaka, K.: Carbon cycle response to temperature overshoot

- 346 beyond 2 °C – an analysis of CMIP6 models, *Earth's Future*, 9, e2020EF001967,  
347 <https://doi.org/10.1029/2020EF001967>, 2021.
- 348 Nakazawa, T.: Current understanding of the global cycling of carbon dioxide, methane, and  
349 nitrous oxide, *Proceedings of the Japan Academy, Series B*, 96, 394–419,  
350 <https://doi.org/10.2183/pjab.96.030>, 2020.
- 351 Nordling, K., Korhonen, H., Räisänen, J., Partanen, A.-I., Samset, B. H., and Merikanto, J.:  
352 Understanding the surface temperature response and its uncertainty to CO<sub>2</sub>, CH<sub>4</sub>, black  
353 carbon, and sulfate, *Atmos. Chem. Phys.*, 21, 14941–14958, [https://doi.org/10.5194/acp-21-](https://doi.org/10.5194/acp-21-14941-2021)  
354 14941-2021, 2021.
- 355 Palazzo Corner, S., Siegert, M., Ceppi, P., Fox-Kemper, B., Frölicher, T. L., Gallego-Sala, A.,  
356 Haigh, J., Hegerl, G. C., Jones, C. D., Knutti, R., Koven, C. D., MacDougall, A. H.,  
357 Meinshausen, M., Nicholls, Z., Sallée, J. B., Sanderson, B. M., Séférian, R., Turetsky, M.,  
358 Williams, R. G., Zaehle, S., and Rogelj, J.: The Zero Emissions Commitment and climate  
359 stabilization, *Frontiers in Science*, 1, <https://doi.org/10.3389/fsci.2023.1170744>, 2023.
- 360 Richardson, T. B., Forster, P. M., Smith, C. J., Maycock, A. C., Wood, T., Andrews, T., Boucher,  
361 O., Faluvegi, G., Fläschner, D., Hodnebrog, Ø., Kassoar, M., Kirkevåg, A., Lamarque, J.-F.,  
362 Mülmenstädt, J., Myhre, G., Olivié, D., Portmann, R. W., Samset, B. H., Shawki, D., Shindell,  
363 D., Stier, P., Takemura, T., Voulgarakis, A., and Watson-Parris, D.: Efficacy of Climate  
364 Forcings in PDRMIP Models, *J Geophys Res Atmos*, 124, 12824–12844,  
365 <https://doi.org/10.1029/2019JD030581>, 2019.
- 366 Schwinger, J. and Tjiputra, J.: Ocean Carbon Cycle Feedbacks Under Negative Emissions,  
367 *Geophysical Research Letters*, 45, 5062–5070, <https://doi.org/10.1029/2018GL077790>, 2018.
- 368 Schwinger, J., Tjiputra, J. F., Heinze, C., Bopp, L., Christian, J. R., Gehlen, M., Ilyina, T., Jones,  
369 C. D., Salas-Méllia, D., Segschneider, J., Séférian, R., and Totterdell, I.: Nonlinearity of Ocean  
370 Carbon Cycle Feedbacks in CMIP5 Earth System Models, *Journal of Climate*, 27, 3869–3888,  
371 <https://doi.org/10.1175/JCLI-D-13-00452.1>, 2014.
- 372 Williams, R. G., Katavouta, A., and Goodwin, P.: Carbon-Cycle Feedbacks Operating in the  
373 Climate System, *Current Climate Change Reports*, 5, 282–295,  
374 <https://doi.org/10.1007/s40641-019-00144-9>, 2019.
- 375 Zhu, X., Zhuang, Q., Gao, X., Sokolov, A., and Schlosser, C. A.: Pan-Arctic land–atmospheric  
376 fluxes of methane and carbon dioxide in response to climate change over the 21st century,  
377 *Environmental Research Letters*, 8, 045003, <https://doi.org/10.1088/1748-9326/8/4/045003>,  
378 2013.
- 379 Zickfeld, K., Eby, M., Matthews, H. D., Schmittner, A., and Weaver, A. J.: Nonlinearity of  
380 Carbon Cycle Feedbacks, *Journal of Climate*, 24, 4255–4275,  
381 <https://doi.org/10.1175/2011JCLI3898.1>, 2011.
- 382 Zickfeld, K., MacDougall, A. H., and Matthews, H. D.: On the proportionality between global  
383 temperature change and cumulative CO<sub>2</sub> emissions during periods of net negative CO<sub>2</sub>  
384 emissions, *Environ. Res. Lett.*, 11, 055006, <https://doi.org/10.1088/1748-9326/11/5/055006>,  
385 2016.
- 386
